# Supplementary material for: Modulating photo-luminescence of Au2Cu6 nanoclusters via ligand-engineering
Source: Royal Society of Chemistry journal article supplement (doi:10.1039/c7ra04743f), 2017-01-01
Supplement: c7ra04743f1.pdf [file c7ra04743f1.pdf]

## Electronic Supplementary Information

### Modulating Photo-Luminescence of Au<sub>2</sub>Cu<sub>6</sub> Nanocluster via Ligand-Engineering

Xi Kang, Xiaowu Li,\* Haizhu Yu, Ying Lv, Guodong Sun, Yangfeng Li, Shuxin Wang, and Manzhou Zhu\*  
Department of Chemistry and Center for Atomic Engineering of Advanced Materials, Anhui Province Key Laboratory of Chemistry for Inorganic/Organic Hybrid Functionalized Materials, Anhui University, Hefei, Anhui 230601, China.

#### Chemicals

All reagents were purchased from Acros Organics or Sigma-Aldrich and used without further purification. Tetrachloroauric (III) acid (HAuCl<sub>4</sub>•3H<sub>2</sub>O, 99.99% metals basis), copper(I) chloride (CuCl, 99.99%, metals basis), adamantane-1-thiol (C<sub>10</sub>H<sub>15</sub>SH, 95%), triphenylphosphine (PPh<sub>3</sub>, 98%), tris(4-methoxyphenyl)phosphine (P(Ph-OMe)<sub>3</sub>, 98%), tris(4-fluorophenyl)phosphine (P(Ph-F)<sub>3</sub>, 98%), sodium borohydride (NaBH<sub>4</sub>, 98%). Toluene (Tol, HPLC grade, Aldrich), methanol (CH<sub>3</sub>OH, HPLC, Aldrich), acetonitrile (CH<sub>3</sub>CN, HPLC grade, Aldrich), methylene chloride (CH<sub>2</sub>Cl<sub>2</sub>, HPLC grade, Aldrich), aether ((CH<sub>3</sub>CH<sub>2</sub>)<sub>2</sub>O, A.R., Sinopharm Chemical Reagent Co. Ltd.). Pure water was purchased from Wahaha Co. Ltd. All reagents were used as received without further purification. All glassware was thoroughly cleaned with aqua regia (HCl:HNO<sub>3</sub> = 3:1 vol%), rinsed with copious pure water, and then dried in an oven prior to use.

#### Characterization

All UV-vis absorption spectra of nanoclusters dissolved in CH<sub>2</sub>Cl<sub>2</sub> were recorded using an Agilent 8453 diode array spectrometer, whose background correction was made using a CH<sub>2</sub>Cl<sub>2</sub> blank. Solid samples were dissolved in CH<sub>2</sub>Cl<sub>2</sub> to make a dilute solution firstly with a subsequent transformation to a 1 cm path length quartz cuvette, followed by spectral measurements. Thermogravimetric analysis (TGA) was carried out on a thermogravimetric analyzer (DTG-60H, Shimadzu Instruments, Inc.) with 5 mg of nanocluster in a SiO<sub>2</sub> pan at a heating rate of 10 K min<sup>-1</sup> from room temperature (about 298 K) to 1073 K. X-ray photoelectron spectroscopy (XPS) measurement was performed on a Thermo ESCALAB 250, configured with a monochromated AlK $\alpha$  (1486.8 eV) 150W X-ray source, 0.5 mm circular spot size, a flood gun to counter charging effects, and the analysis chamber base pressure lower than 1x10<sup>-9</sup> mbar, data were collected with FAT=20 eV. Inductively coupled plasma-atomic emission spectrometry (ICP-AES) measurements were performed on an Atomscan Advantage instrument made by Thermo Jarrell Ash Corporation (USA). The nanoclusters were digested by concentrated nitric acid and the concentration of the nanoclusters were set to 0.5 mg L<sup>-1</sup> approximately. Photoluminescence spectra were measured on a FL-4500 spectrofluorometer with the same optical density (OD) ~0.05. In these experiments, the nanoclusters solution were prepared in CH<sub>2</sub>Cl<sub>2</sub> at a concentration of less than 1 mg mL<sup>-1</sup>. Absolute quantum yields (QY) were measured with dilute solutions of nanoclusters (0.05 OD absorption at 480 nm) on HORIBA FluoroMax-4P. The data collection for single crystal X-ray diffraction was carried out on a Bruker Smart APEX II CCD diffractometer under liquid nitrogen flow at 173 K, using graphite-monochromatized Cu K $\alpha$  radiation ( $\lambda$  = 1.54178 Å). Data reductions and absorption corrections were performed using the SAINT and SADABS programs, respectively. The structure was solved by direct methods and

refined with full-matrix least squares on  $F^2$  using the SHELXTL software package. All non-hydrogen atoms were refined anisotropically, and all the hydrogen atoms were set in geometrically calculated positions and refined isotropically using a riding model.

## Syntheses

### Synthesis of $\text{Au}_2\text{Cu}_6(\text{S-Adm})_6(\text{P(Ph-OMe)}_3)_2$ nanocluster

Briefly,  $\text{CuCl}$  (0.0198 g, 0.2 mmol) was dissolved in 5 mL  $\text{CH}_3\text{CN}$  and 5 mL  $\text{CH}_3\text{OH}$ , and  $\text{AdmSH}$  (0.1346 g, 0.8 mmol) was dissolved in 5 mL toluene. These two solutions were blended in a 100 mL tri-neck round bottom flask. The solution was vigorously stirred ( $\sim 1200$  rpm) with a magnetic stirring for 15 min. Then,  $[\text{AuP(Ph-OMe)}_3\text{Cl}]$  (0.24 g, 0.4 mmol) was dissolved in 1 mL ice-cold toluene, and  $\text{NaBH}_4$  (80 mg,  $\sim 5$  equivalent per mole of gold) was dissolved in 1 mL ice-cold water. Both solvents were added drop-wise to the solution at the same time under vigorous stirring. The reaction was allowed to proceed for 60 hours under  $\text{N}_2$  atmosphere. After that, the resulting solution mixture was centrifuged to obtain the solids, which was then washed several times with toluene. Then the final product was dissolved in  $\text{CH}_2\text{Cl}_2$ , and used to crystallize directly. The as-prepared nanocluster was crystallized in  $\text{CH}_2\text{Cl}_2/\text{CH}_3\text{OH}$  at room temperature ( $\sim 3$  days); dark red crystals were collected and subjected to X-ray diffraction analysis to determine the structure.

### Syntheses of $\text{Au}_2\text{Cu}_6(\text{S-Adm})_6(\text{PPh}_3)_2$ and $\text{Au}_2\text{Cu}_6(\text{S-Adm})_6(\text{P(Ph-F)}_3)_2$ nanoclusters

The  $\text{Au}_2\text{Cu}_6(\text{S-Adm})_6(\text{PPh}_3)_2$  and  $\text{Au}_2\text{Cu}_6(\text{S-Adm})_6(\text{P(Ph-F)}_3)_2$  nanoclusters were prepared by the same method as that of the  $\text{Au}_2\text{Cu}_6(\text{S-Adm})_6(\text{P(Ph-OMe)}_3)_2$  nanocluster. The mole ratio of  $\text{PPh}_3$  or  $\text{P(Ph-F)}_3$  was the same as that of  $\text{P(Ph-OMe)}_3$  ligand.

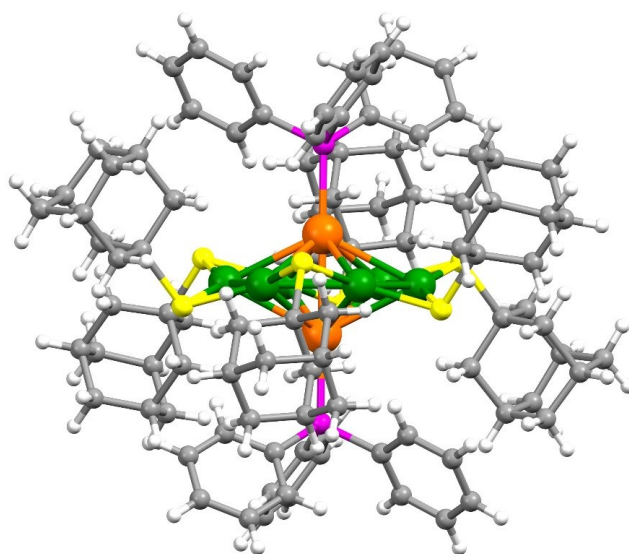

**Fig. S1** The total structure of  $\text{Au}_2\text{Cu}_6(\text{S-Adm})_6(\text{PPh}_3)_2$ . Color legends: orange, Au; green, Cu; yellow, S; purple, P; gray, C and light gray, H.

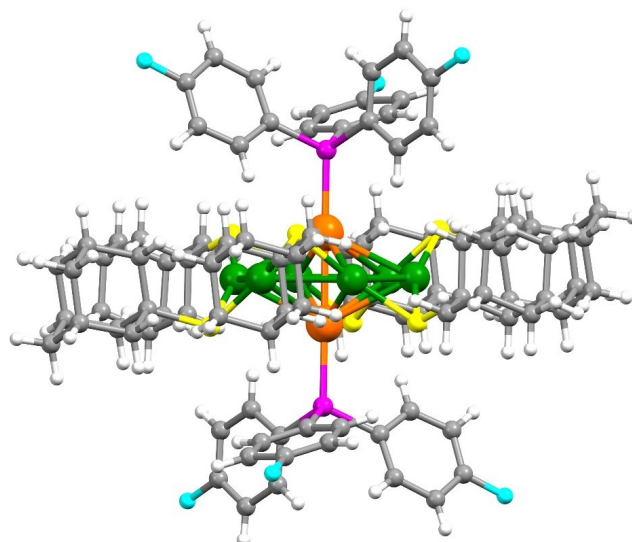

**Fig. S2** The total structure of  $\text{Au}_2\text{Cu}_6(\text{S-Adm})_6(\text{P}(\text{Ph-F})_3)_2$ . Color legends: orange, Au; green, Cu; yellow, S; purple, P; cyan, F; gray, C and light gray, H.

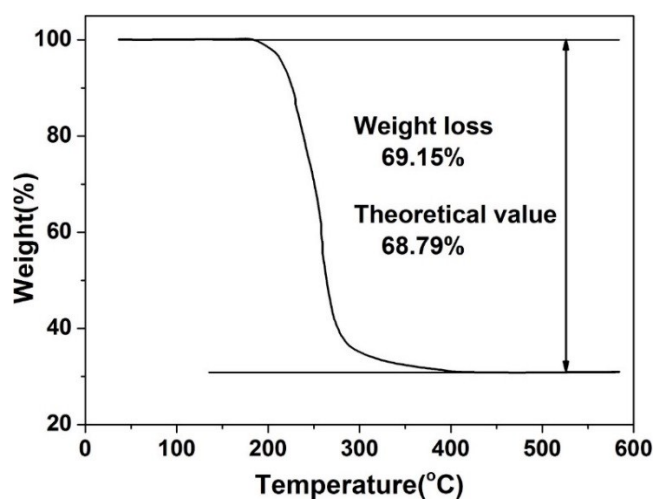

**Fig. S3** TGA result of the  $\text{Au}_2\text{Cu}_6(\text{S-Adm})_6(\text{P}(\text{Ph-OMe})_3)_2$  nanocluster.

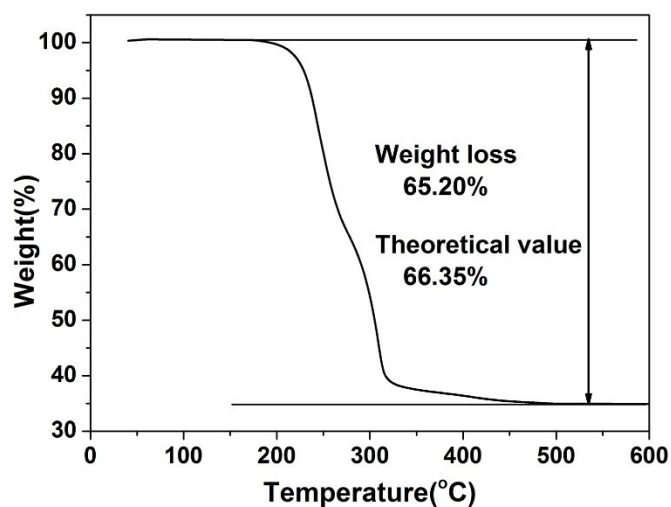

**Fig. S4** TGA result of the  $\text{Au}_2\text{Cu}_6(\text{S-Adm})_6(\text{PPh}_3)_2$  nanocluster.

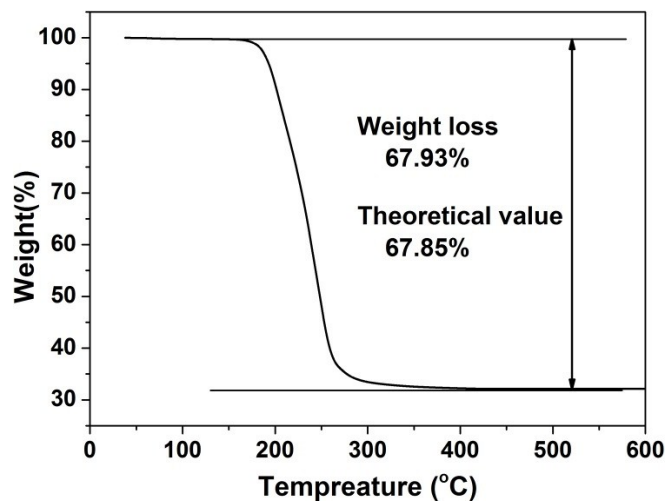

**Fig. S5** TGA result of the  $\text{Au}_2\text{Cu}_6(\text{S-Adm})_6(\text{P}(\text{Ph-F})_3)_2$  nanocluster.

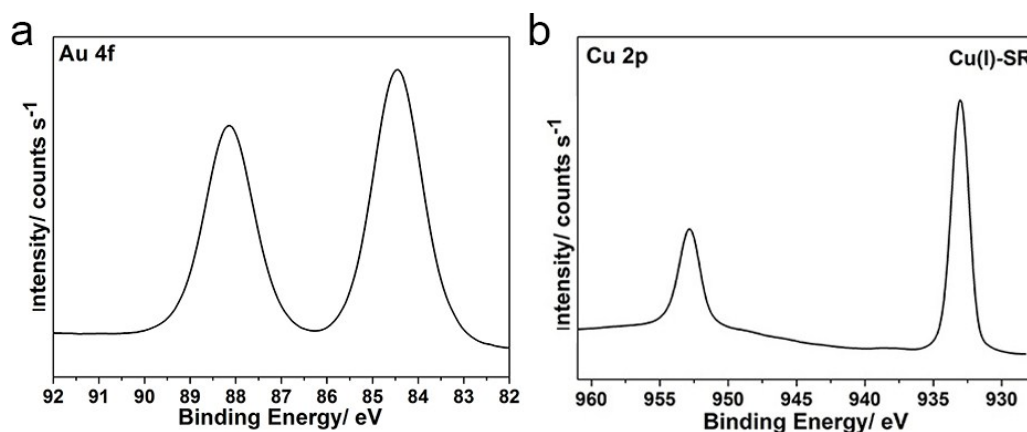

**Fig. S6** X-ray photoelectron spectroscopy (XPS) of a) Au 4f, b) Cu 2p in  $\text{Au}_2\text{Cu}_6(\text{S-Adm})_6(\text{P}(\text{Ph-OMe})_3)_2$  nanocluster.

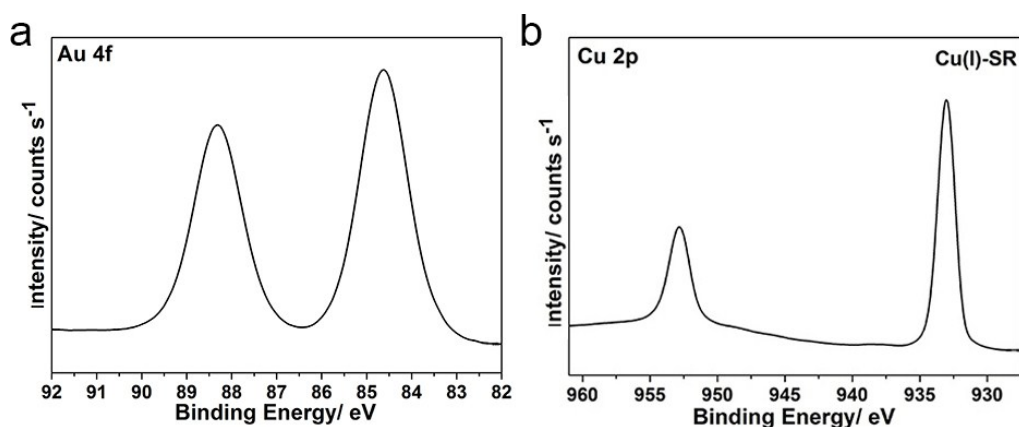

**Fig. S7** X-ray photoelectron spectroscopy (XPS) of a) Au 4f, b) Cu 2p in  $\text{Au}_2\text{Cu}_6(\text{S-Adm})_6(\text{PPh}_3)_2$  nanocluster.

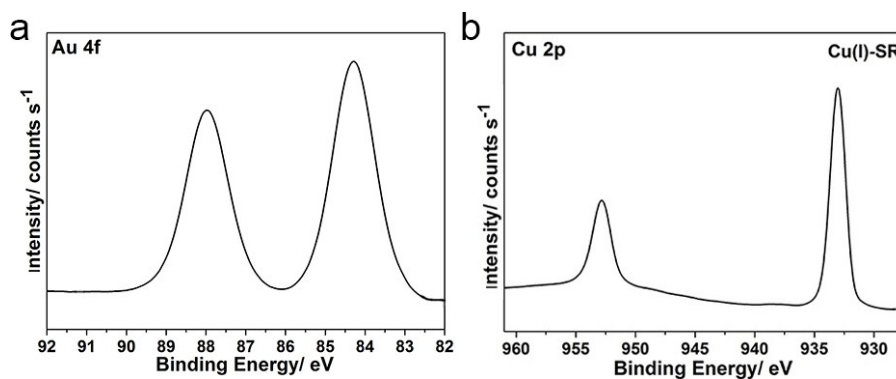

**Fig. S8** X-ray photoelectron spectroscopy (XPS) of a) Au 4f, b) Cu 2p in  $\text{Au}_2\text{Cu}_6(\text{S-Adm})_6(\text{P}(\text{Ph-F})_3)_2$  nanocluster.

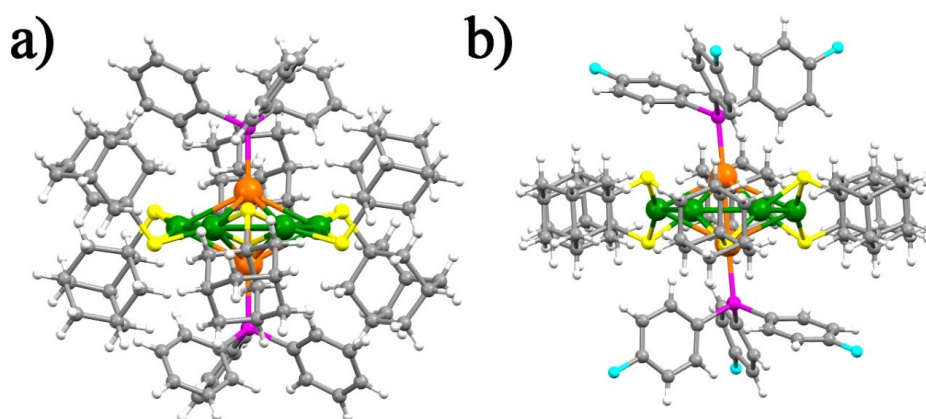

**Fig. S9** Structure comparison of a)  $\text{Au}_2\text{Cu}_6(\text{S-Adm})_6(\text{PPh}_3)_2$  and b)  $\text{Au}_2\text{Cu}_6(\text{S-Adm})_6(\text{P}(\text{Ph-F})_3)_2$ . Color legends: orange, Au; green, Cu; yellow, S; purple, P; cyan, F; gray, C and light gray, H.

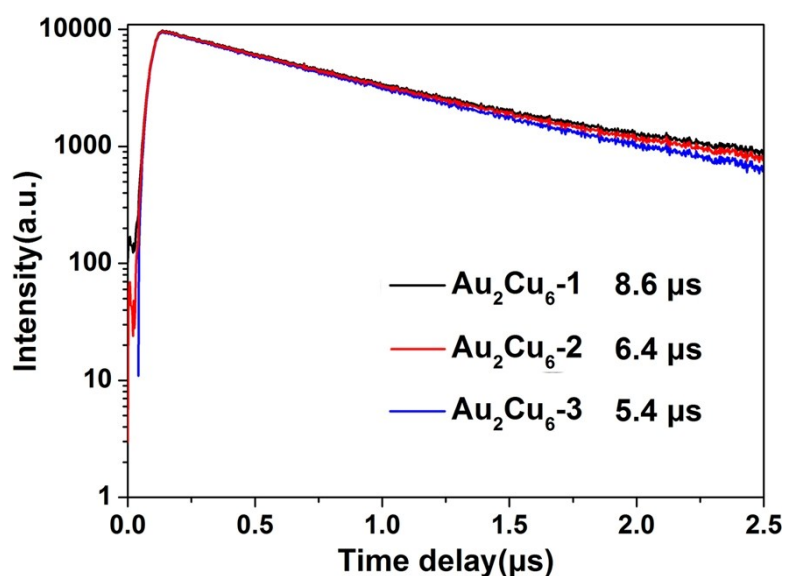

**Fig. S10** The analyses on fluorescence lifetime of three  $\text{Au}_2\text{Cu}_6(\text{S-Adm})_6(\text{PR}_3)_2$  nanoclusters (Black line: R=Ph-OMe; Red line: R=Ph; Blue line: R=Ph-F).

**Table S1:** Crystal data and structure refinement for the Au<sub>2</sub>Cu<sub>6</sub>(S-Adm)<sub>6</sub>(PPh<sub>3</sub>)<sub>2</sub> nanocluster.

|                                   |                                                                                                |                   |
|-----------------------------------|------------------------------------------------------------------------------------------------|-------------------|
| Compound reference                | Au <sub>2</sub> Cu <sub>6</sub> (S-Adm) <sub>6</sub> (PPh <sub>3</sub> ) <sub>2</sub>          |                   |
| Empirical formula                 | C <sub>96</sub> H <sub>120</sub> Au <sub>2</sub> Cu <sub>6</sub> P <sub>2</sub> S <sub>6</sub> |                   |
| Formula weight                    | 2303.39                                                                                        |                   |
| Temperature                       | 173 K                                                                                          |                   |
| Wavelength                        | 1.54178 Å                                                                                      |                   |
| Crystal system                    | Trigonal                                                                                       |                   |
| Space group                       | R -3                                                                                           |                   |
| Unit cell dimensions              | A=20.9938(7) Å                                                                                 | $\alpha=90^\circ$ |
|                                   | B=20.9938(7) Å                                                                                 | $\beta=120^\circ$ |
|                                   | C= 18.1449(7) Å                                                                                | $\gamma=90^\circ$ |
| Volume                            | 6925.8(5) Å <sup>3</sup>                                                                       |                   |
| Z                                 | 3                                                                                              |                   |
| Density (calculated)              | 1.657 Mg m <sup>-3</sup>                                                                       |                   |
| Absorption coefficient            | 9.222 mm <sup>-1</sup>                                                                         |                   |
| F(000)                            | 3462                                                                                           |                   |
| Crystal size                      | 0.03 × 0.03 × 0.02 mm <sup>3</sup>                                                             |                   |
| Theta range for data collection   | 3.44 to 66.78°                                                                                 |                   |
| Index ranges                      | -24<=h<=24, -22<=k<=24, -21<=l<=21                                                             |                   |
| Reflections collected             | 13540                                                                                          |                   |
| Independent reflections           | 2592                                                                                           |                   |
| Absorption correction             | Multi scan                                                                                     |                   |
| Refinement method                 | SHELXL-2013 (Sheldrick 2013)                                                                   |                   |
| Data / restraints / parameters    | 2592 / 360 / 169                                                                               |                   |
| Goodness-of-fit on F <sup>2</sup> | 0.916                                                                                          |                   |
| Final R indices [I>2sigma(I)]     | R1=0.0473, wR2=0.1464                                                                          |                   |
| R indices (all data)              | R1=0.0560, wR2=0.1550                                                                          |                   |

**Table S2:** Crystal data and structure refinement for the Au<sub>2</sub>Cu<sub>6</sub>(S-Adm)<sub>6</sub>(P(Ph-F)<sub>3</sub>)<sub>2</sub> nanocluster.

|                                   |                                                                                                               |               |
|-----------------------------------|---------------------------------------------------------------------------------------------------------------|---------------|
| Compound reference                | Au <sub>2</sub> Cu <sub>6</sub> (S-Adm) <sub>6</sub> (P(Ph-F) <sub>3</sub> ) <sub>2</sub>                     |               |
| Empirical formula                 | C <sub>96</sub> H <sub>114</sub> Au <sub>2</sub> Cu <sub>6</sub> F <sub>6</sub> P <sub>2</sub> S <sub>6</sub> |               |
| Formula weight                    | 2673.52                                                                                                       |               |
| Temperature                       | 173 K                                                                                                         |               |
| Wavelength                        | 1.54178 Å                                                                                                     |               |
| Crystal system                    | Triclinic                                                                                                     |               |
| Space group                       | P -1                                                                                                          |               |
| Unit cell dimensions              | A=13.5650(5) Å                                                                                                | α=111.329(2)° |
|                                   | B=15.6970(6) Å                                                                                                | β=98.629(2)°  |
|                                   | C=15.8108(6) Å                                                                                                | γ=114.913(2)° |
| Volume                            | 2654.64(18) Å <sup>3</sup>                                                                                    |               |
| Z                                 | 1                                                                                                             |               |
| Density (calculated)              | 1.672 Mg m <sup>-3</sup>                                                                                      |               |
| Absorption coefficient            | 9.878 mm <sup>-1</sup>                                                                                        |               |
| F(000)                            | 1327                                                                                                          |               |
| Crystal size                      | 0.03 × 0.02 × 0.01 mm <sup>3</sup>                                                                            |               |
| Theta range for data collection   | 5.06 to 72.65°                                                                                                |               |
| Index ranges                      | -16 ≤ h ≤ 15, -18 ≤ k ≤ 18, -17 ≤ l ≤ 16                                                                      |               |
| Reflections collected             | 11016                                                                                                         |               |
| Independent reflections           | 7655                                                                                                          |               |
| Absorption correction             | Multi scan                                                                                                    |               |
| Refinement method                 | SHELXL-2013 (Sheldrick 2013)                                                                                  |               |
| Data / restraints / parameters    | 7655 / 1194 / 560                                                                                             |               |
| Goodness-of-fit on F <sup>2</sup> | 1.057                                                                                                         |               |
| Final R indices [I > 2σ(I)]       | R1=0.0670, wR2=0.1805                                                                                         |               |
| R indices (all data)              | R1=0.0800, wR2=0.1928                                                                                         |               |

**Table S3:** The atomically ratio of Au and Cu in Au<sub>2</sub>Cu<sub>6</sub> NCs calculated from inductively coupled plasma (ICP) and X-ray photoelectric spectroscopy (XPS) measurements.

| Measurement                                      | Au (%) | Cu (%) |
|--------------------------------------------------|--------|--------|
| ICP result on Au <sub>2</sub> Cu <sub>6</sub> -1 | 24.5%  | 75.5%  |
| XPS result on Au <sub>2</sub> Cu <sub>6</sub> -1 | 24.8%  | 75.2%  |
| ICP result on Au <sub>2</sub> Cu <sub>6</sub> -2 | 21.7%  | 78.3%  |
| XPS result on Au <sub>2</sub> Cu <sub>6</sub> -2 | 22.2%  | 77.8%  |
| ICP result on Au <sub>2</sub> Cu <sub>6</sub> -3 | 24.2%  | 75.8%  |
| XPS result on Au <sub>2</sub> Cu <sub>6</sub> -3 | 24.9%  | 75.1%  |
